# Supplementary material for: New aspects of the environmental risks of quantum dots: prophage activation
Source: Royal Society of Chemistry journal article supplement (doi:10.1039/c8en00142a), 2018-01-01
Supplement: c8en00142a1.pdf [file c8en00142a1.pdf]

## **New Aspects of the Environmental Risks of Quantum Dots: Prophage Activation**

Juan Xu<sup>1</sup>, Ying-Ying Wang<sup>1</sup>, Ren Yan<sup>1</sup>, Lian-Jiao Zhou<sup>1</sup>, Yu-zhu Liu<sup>1</sup>, Feng-Lei

Jiang<sup>1,\*</sup>, Thomas Maskow<sup>2,\*</sup> Yi Liu<sup>1,3,4,\*</sup>

<sup>1</sup> State Key Laboratory of Virology & Key Laboratory of Analytical Chemistry for Biology and Medicine (MOE), College of Chemistry and Molecular Sciences, Wuhan University, Wuhan 430072, P. R. China

<sup>2</sup> UFZ, Helmholtz Centre for Environmental Research, Department of Environmental Microbiology, Permoserstr. 15, 04318 Leipzig, Germany

<sup>3</sup> Key Laboratory of Coal Conversion and Carbon Materials of Hubei Province, College of Chemistry and Chemical Engineering, Wuhan University of Science and Technology, Wuhan 430081, P. R. China

<sup>4</sup> College of Chemistry and Material Sciences, Guangxi Teachers Education University, Nanning 530001, P. R. China

\*Corresponding Author. Tel: 86-27-68756667. Fax: 86-27-68754067. Email address: yiliuchem@whu.edu.cn, thomas.maskow@ufz.de, fljiang@whu.edu.cn.

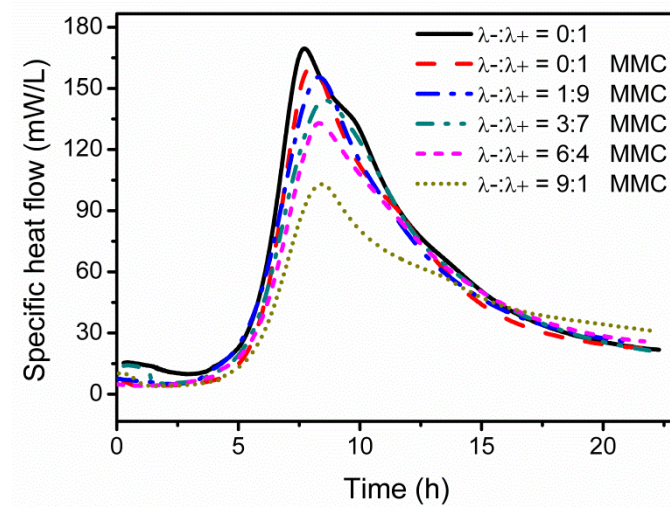

**Figure S1.** Dependency of the metabolic heat production rate of *E. coli* with different ratio of  $\lambda^+$  at the same concentration of Mitomycin C (15  $\mu$ M, MMC).

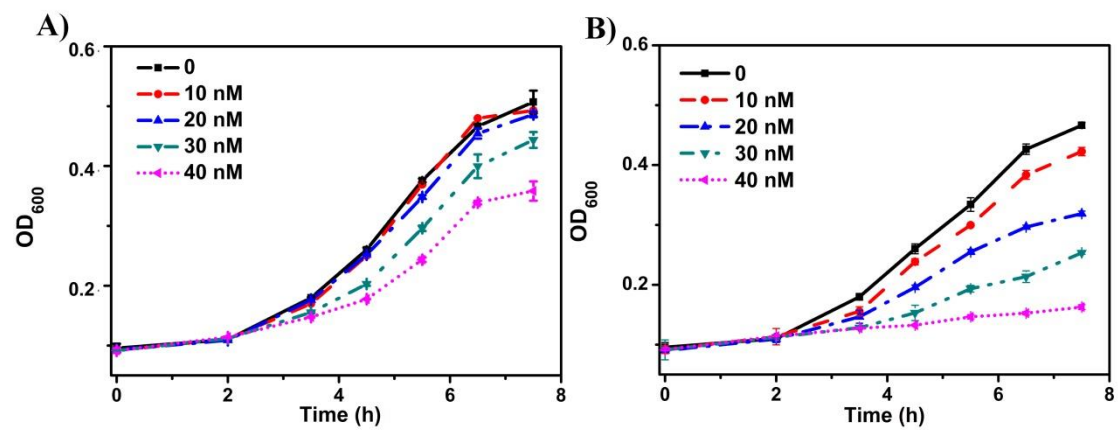

**Figure S2.** (A) Growth curves of normal *E. coli* ( $\lambda^-$ ) treated with GSH-CdTe QDs. (B) Growth curves of mixture *E. coli* ( $\lambda^- : \lambda^+ = 9 : 1$ ) treated with GSH-CdTe QDs.

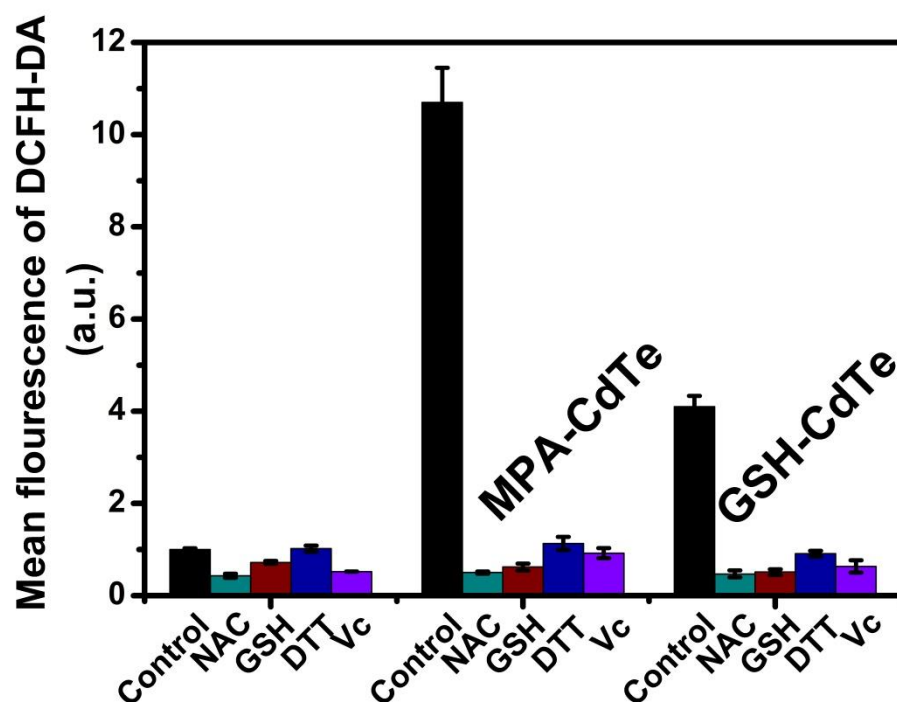

**Figure S3.** Treatments of antioxidants suppress the accumulation of reactive oxygen species (ROS) formation of MPA-CdTe and GSH-CdTe QDs.

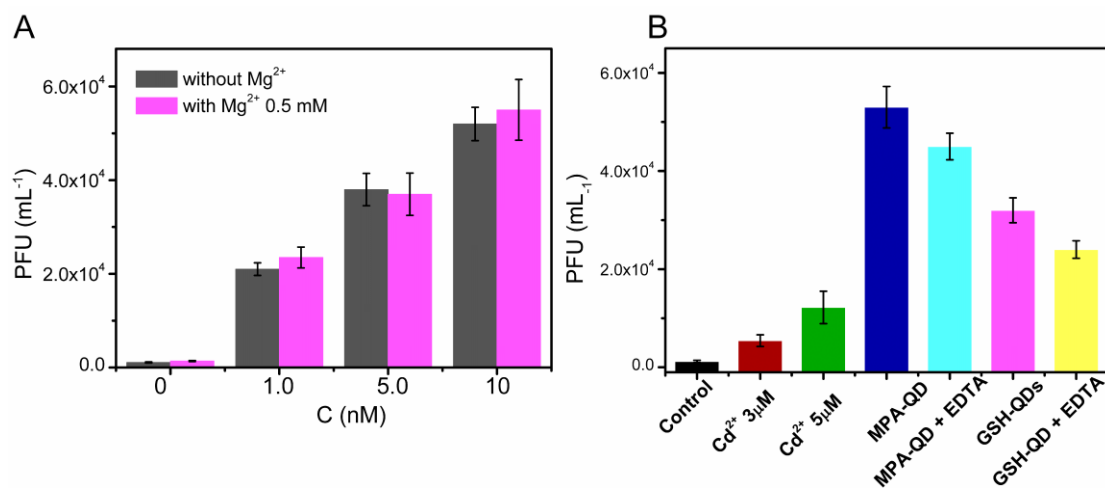

**Figure S4** (A) Prophage activation of MPA-CdTe QDs in medium without and with  $Mg^{2+}$ . (B) Protective effect of EDTA on CdTe QDs against prophage activation in medium without  $Mg^{2+}$ .

**Table S1.** Parameters of *E. coli* growth at different concentrations of GSH-QDs.

| <i>E. coli</i> | C (μM) | k <sub>1</sub> (h <sup>-1</sup> ) | R     | P <sub>m</sub> (μW) | Q <sub>total</sub> (J) |
|----------------|--------|-----------------------------------|-------|---------------------|------------------------|
| Lambda-        | 0      | 1.012                             | 0.998 | 304.8               | 11.2                   |
|                | 0.1    | 0.932                             | 0.992 | 322.4               | 10.7                   |
|                | 0.4    | 1.160                             | 0.996 | 319.1               | 9.6                    |
|                | 0.8    | 0.943                             | 0.992 | 296.4               | 10.5                   |
|                | 1.6    | 1.072                             | 0.995 | 332.0               | 11.2                   |
| Mixture        | 0      | 0.911                             | 0.991 | 325.4               | 10.4                   |
|                | 0.1    | 0.775                             | 0.992 | 310.6               | 10.5                   |
|                | 0.4    | 0.644                             | 0.995 | 287.0               | 10.1                   |
|                | 0.8    | 0.621                             | 0.997 | 278.2               | 10.7                   |
|                | 1.6    | 0.571                             | 0.993 | 256.0               | 10.3                   |

**Table S2.** Parameters of *E. coli* growth at different concentrations of MPA-QDs.

| <i>E. coli</i> | C (μM) | k <sub>1</sub> (h <sup>-1</sup> ) | R     | P <sub>m</sub> (μW) | Q <sub>total</sub> (J) |
|----------------|--------|-----------------------------------|-------|---------------------|------------------------|
| Lambda-        | 0      | 0.925                             | 0.996 | 331.4               | 10.9                   |
|                | 0.2    | 0.879                             | 0.993 | 327.1               | 10.1                   |
|                | 0.4    | 0.921                             | 0.996 | 327.4               | 10.6                   |
|                | 0.6    | 0.913                             | 0.994 | 323.4               | 10.4                   |
|                | 0.8    | 0.859                             | 0.999 | 319.8               | 10.0                   |
| Mixture        | 0      | 0.857                             | 0.992 | 341.8               | 11.6                   |
|                | 0.2    | 0.679                             | 0.996 | 343.6               | 11.9                   |
|                | 0.4    | 0.643                             | 0.992 | 304.8               | 11.1                   |
|                | 0.6    | 0.631                             | 0.999 | 250.2               | 11.4                   |
|                | 0.8    | 0.602                             | 0.994 | 252.7               | 11.3                   |
